# Supplementary material for: Pilot test of environment-friendly catalysts for the DeNOx of low-temperature flue gas from a coal-fired plant
Source: Royal Society of Chemistry journal article supplement (doi:10.1039/d0cy02142c), 2021-01-01
Supplement: d0cy02142c1.pdf [file d0cy02142c1.pdf]

| Catalyst               | Preparation method  | Reaction conditions                                                                                               | NO <sub>x</sub> conversion | Resistance to H <sub>2</sub> O and SO <sub>2</sub> |                               |         |                            |                            |                            |      | Refs. |
|------------------------|---------------------|-------------------------------------------------------------------------------------------------------------------|----------------------------|----------------------------------------------------|-------------------------------|---------|----------------------------|----------------------------|----------------------------|------|-------|
|                        |                     |                                                                                                                   |                            | H <sub>2</sub> O concentration                     | SO <sub>2</sub> concentration | T / °C  | NO <sub>x</sub> Conversion | NO <sub>x</sub> conversion | NO <sub>x</sub> conversion |      |       |
|                        |                     |                                                                                                                   |                            | / %                                                | / 10 <sup>-6</sup>            |         | (Start) / %                | (End) / %                  | (Return) / %               |      |       |
|                        | co-precipitation    |                                                                                                                   | > 95% (150-200 °C)         | 5                                                  | 50                            | 150-200 | 95                         |                            | 60-80                      |      |       |
| Mn/CeO <sub>x</sub>    | surfactant template | 5 × 10 <sup>-4</sup> NO, 5 × 10 <sup>-4</sup> NH <sub>3</sub> ,<br>5% O <sub>2</sub> , GHSV=64000 h <sup>-1</sup> | > 92% (150-200 °C)         | 5                                                  | 50                            | 150-200 | 98                         |                            | 92                         | [16] |       |
|                        |                     |                                                                                                                   |                            | 5                                                  | 100                           |         |                            |                            | 89                         | 98   |       |
| Mn/FeO <sub>x</sub>    | citric acid         | 5 × 10 <sup>-4</sup> NO, 5 × 10 <sup>-4</sup> NH <sub>3</sub> ,<br>5% O <sub>2</sub> , GHSV=35000 h <sup>-1</sup> | > 90% (120-180 °C)         | 0                                                  | 100                           | 160     | 98                         | 7                          | 60                         | 70   | [17]  |
|                        |                     |                                                                                                                   |                            | 5                                                  | 0                             |         |                            |                            | 87                         | 93   |       |
|                        |                     |                                                                                                                   |                            | 2                                                  | 0                             |         | 100                        | 10                         | 100                        | 100  |       |
| Mn/SmO <sub>x</sub>    | co-precipitation    | 5 × 10 <sup>-4</sup> NO, 5 × 10 <sup>-4</sup> NH <sub>3</sub> ,<br>5% O <sub>2</sub> , GHSV=90000 h <sup>-1</sup> | > 90% (50-200 °C)          | 2                                                  | 100                           | 100     | 100                        | 15                         | 91                         | 97   | [18]  |
|                        |                     |                                                                                                                   |                            | 0                                                  | 100                           |         | 100                        | 10                         | 96                         | 99   |       |
|                        |                     |                                                                                                                   |                            | 0                                                  | 100                           |         | 97.6                       |                            | 97.6                       |      |       |
| Fe-Ce/TiO <sub>x</sub> | impregnation        | 1 × 10 <sup>-3</sup> NO, 1 × 10 <sup>-3</sup> NH <sub>3</sub> ,<br>3% O <sub>2</sub> , GHSV=10000 h <sup>-1</sup> | > 95% (250 °C)             | 0                                                  | 500                           | 250     | 97.6                       | 100                        | 92                         |      | [19]  |

|                           |              |                                                                                                                   |   |      |     |      |   |    |      |
|---------------------------|--------------|-------------------------------------------------------------------------------------------------------------------|---|------|-----|------|---|----|------|
|                           |              |                                                                                                                   | 0 | 1000 |     | 97.6 |   | 90 |      |
| Ce/ZrO <sub>x</sub>       | hydrothermal |                                                                                                                   |   |      |     |      |   |    |      |
|                           |              |                                                                                                                   |   |      |     |      |   |    |      |
| Ti-Ce/ZrO <sub>x</sub>    | hydrolysis   | 5 × 10 <sup>-4</sup> NO, 5 × 10 <sup>-4</sup> NH <sub>3</sub> ,<br>5% O <sub>2</sub> , GHSV=60000 h <sup>-1</sup> |   |      |     | 40   |   | 30 | 35   |
|                           |              |                                                                                                                   |   |      |     |      |   |    | [20] |
| Mn-Ce/ZrO <sub>x</sub>    | impregnation |                                                                                                                   | 5 | 100  | 200 | 75   | 8 | 53 | 70   |
|                           |              |                                                                                                                   |   |      |     |      |   |    |      |
| Mn-Ti-Ce/ZrO <sub>x</sub> |              |                                                                                                                   |   |      |     | 95   |   | 70 | 85   |

---

Preparation of low-temperature catalysts doped with different metals, and comparison of their NO<sub>x</sub> conversion and H<sub>2</sub>O/SO<sub>2</sub> resistances
